# Supplementary material for: Tracking phosphorus dynamics: Historical and future trends in eight Lake Erie tributaries
Source: Copernicus journal article supplement (doi:10.5194/hess-2024-302), 2024-11-19
Supplement: Supplementary file 1 [file hess-2024-302-supplement.pdf]

1    ***Supplementary Information***

2

3    **Tracking phosphorus dynamics: Historical and future trends in eight Lake Erie tributaries**

4    Jiaxin Wang <sup>1,2</sup>, Zhiming Qi <sup>1</sup>, Tiequan Zhang <sup>3</sup>

5    <sup>1</sup> Department of Bioresource Engineering, McGill University, Sainte-Anne-de-Bellevue, Quebec,  
6    Canada

7    <sup>2</sup> School of Environment, Tsinghua University, Beijing, China

8    <sup>3</sup> Harrow Research and Development Centre, Agriculture and Agri-Food Canada, Ottawa, Canada

9    *Correspondence to:* Zhiming Qi (zhiming.qi@mcgill.ca)

10

11

12

13

14

15

16

17

18

19

20

21

22

23

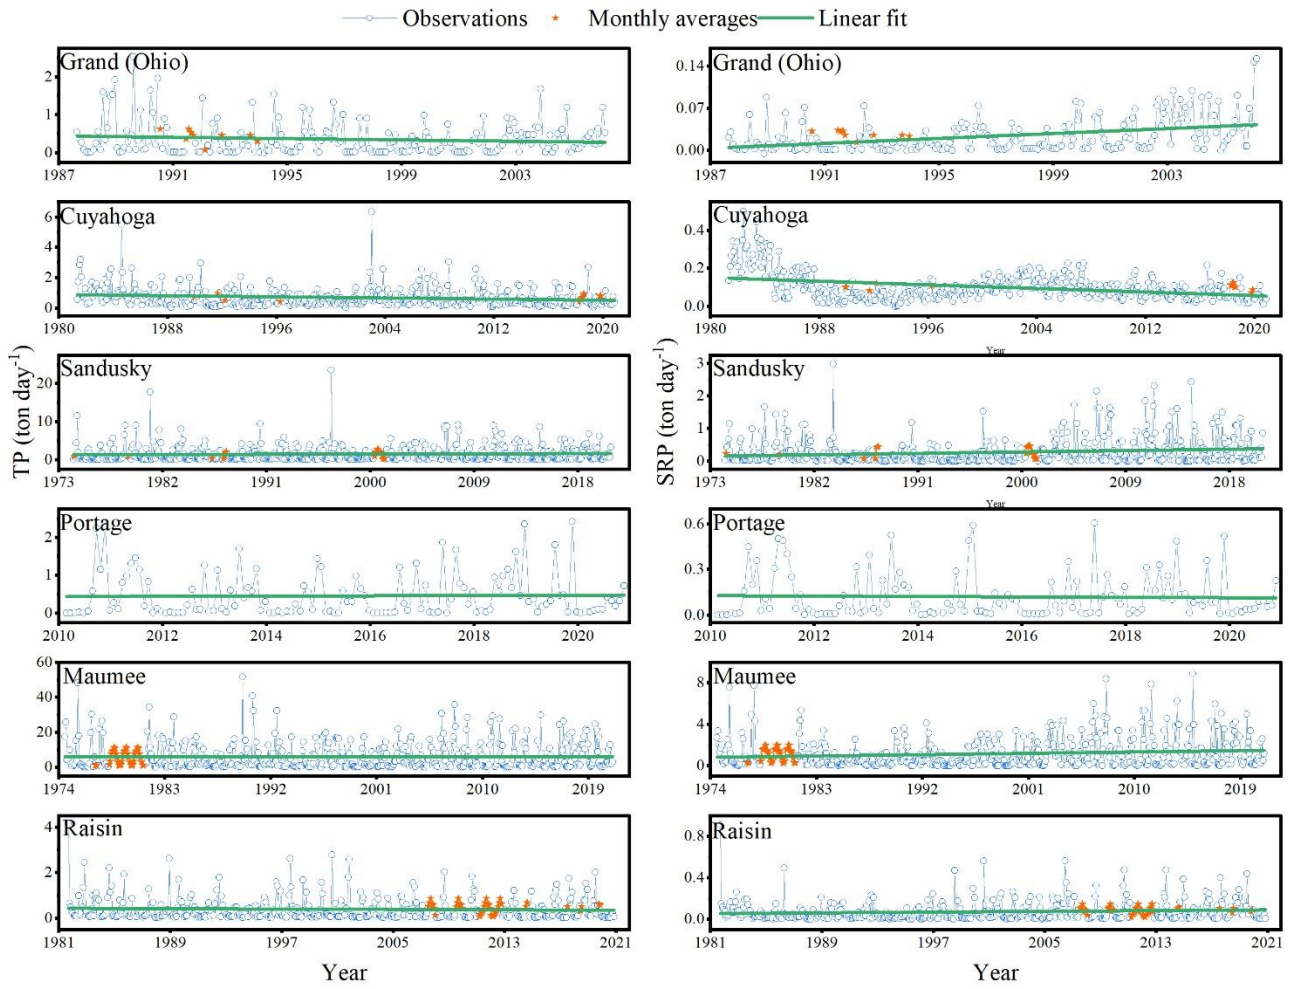

24

25 **Figure S1.** Monthly time series of monitored P loads. Imputed values are depicted in orange. The  
 26 green line denotes a least-squares linear fit among the data.

27

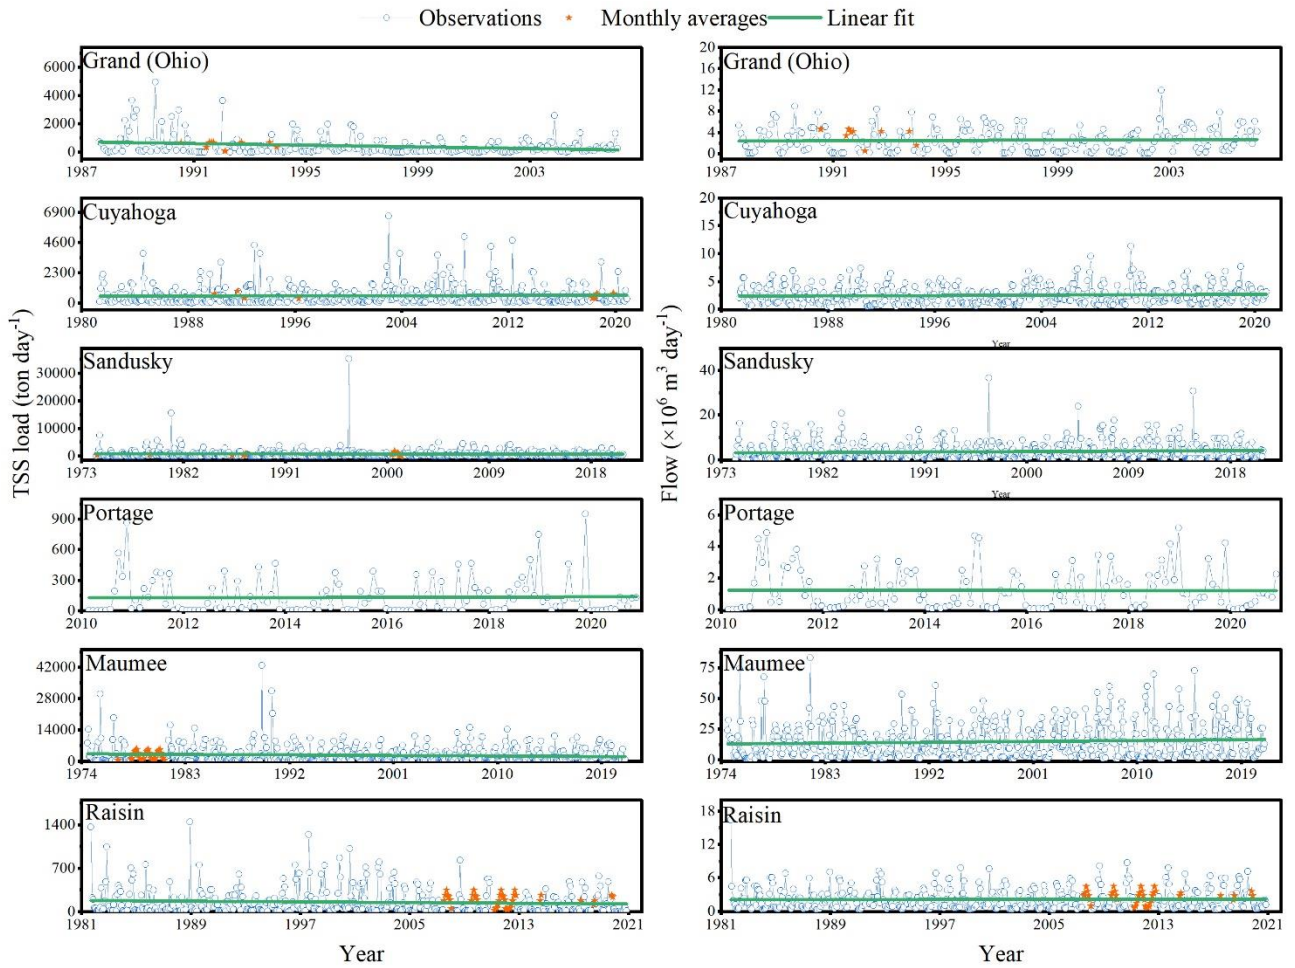

28

29 **Figure S2.** Monthly time series of monitored TSS loads and streamflow. Imputed values are depicted  
 30 in orange. The green line denotes a least-squares linear fit among the data.

31

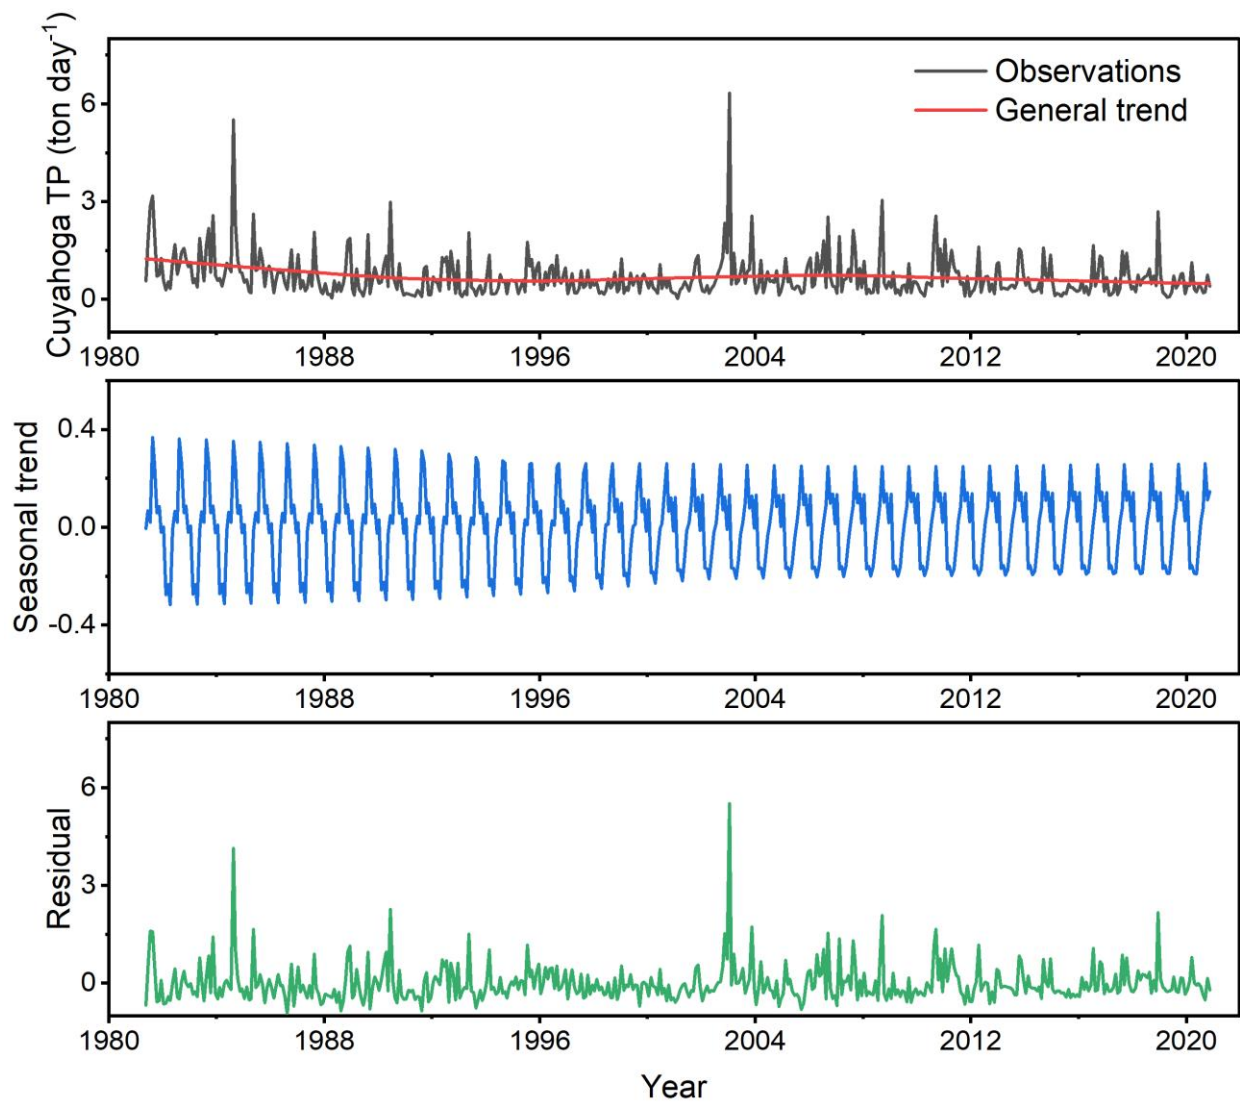

32

33 **Figure S3.** An example using STL method to decompose TP load time series data in Cuyahoga River  
 34 into smoothed long-term and seasonal trends.

35

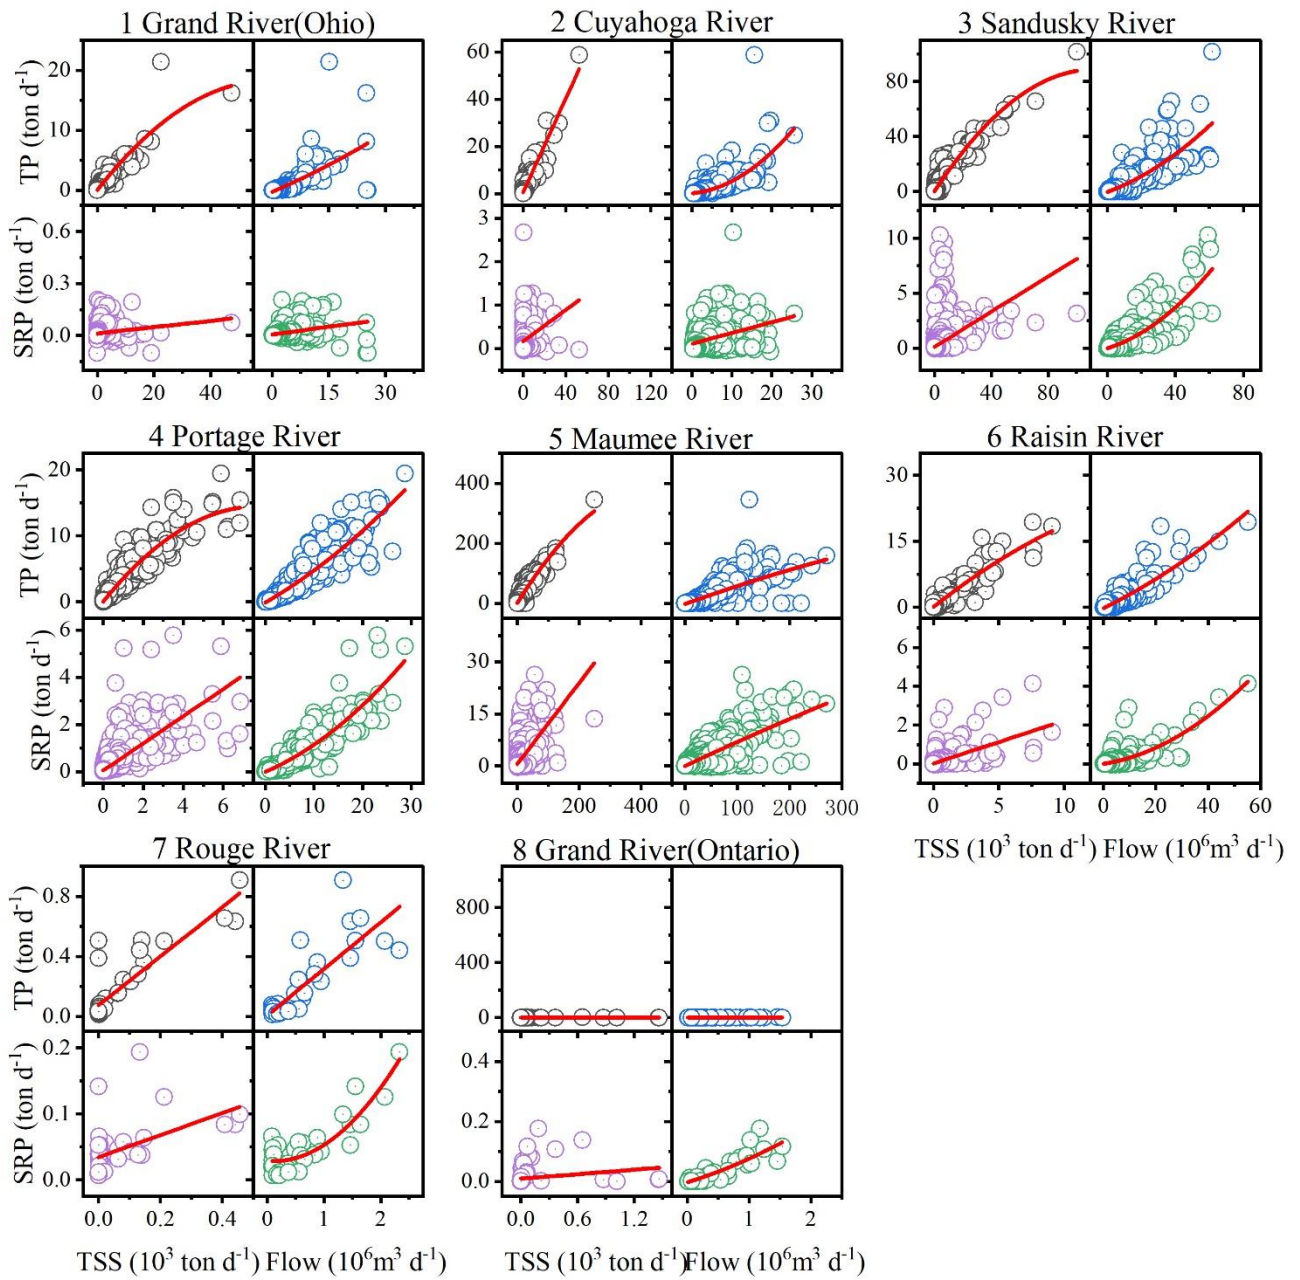



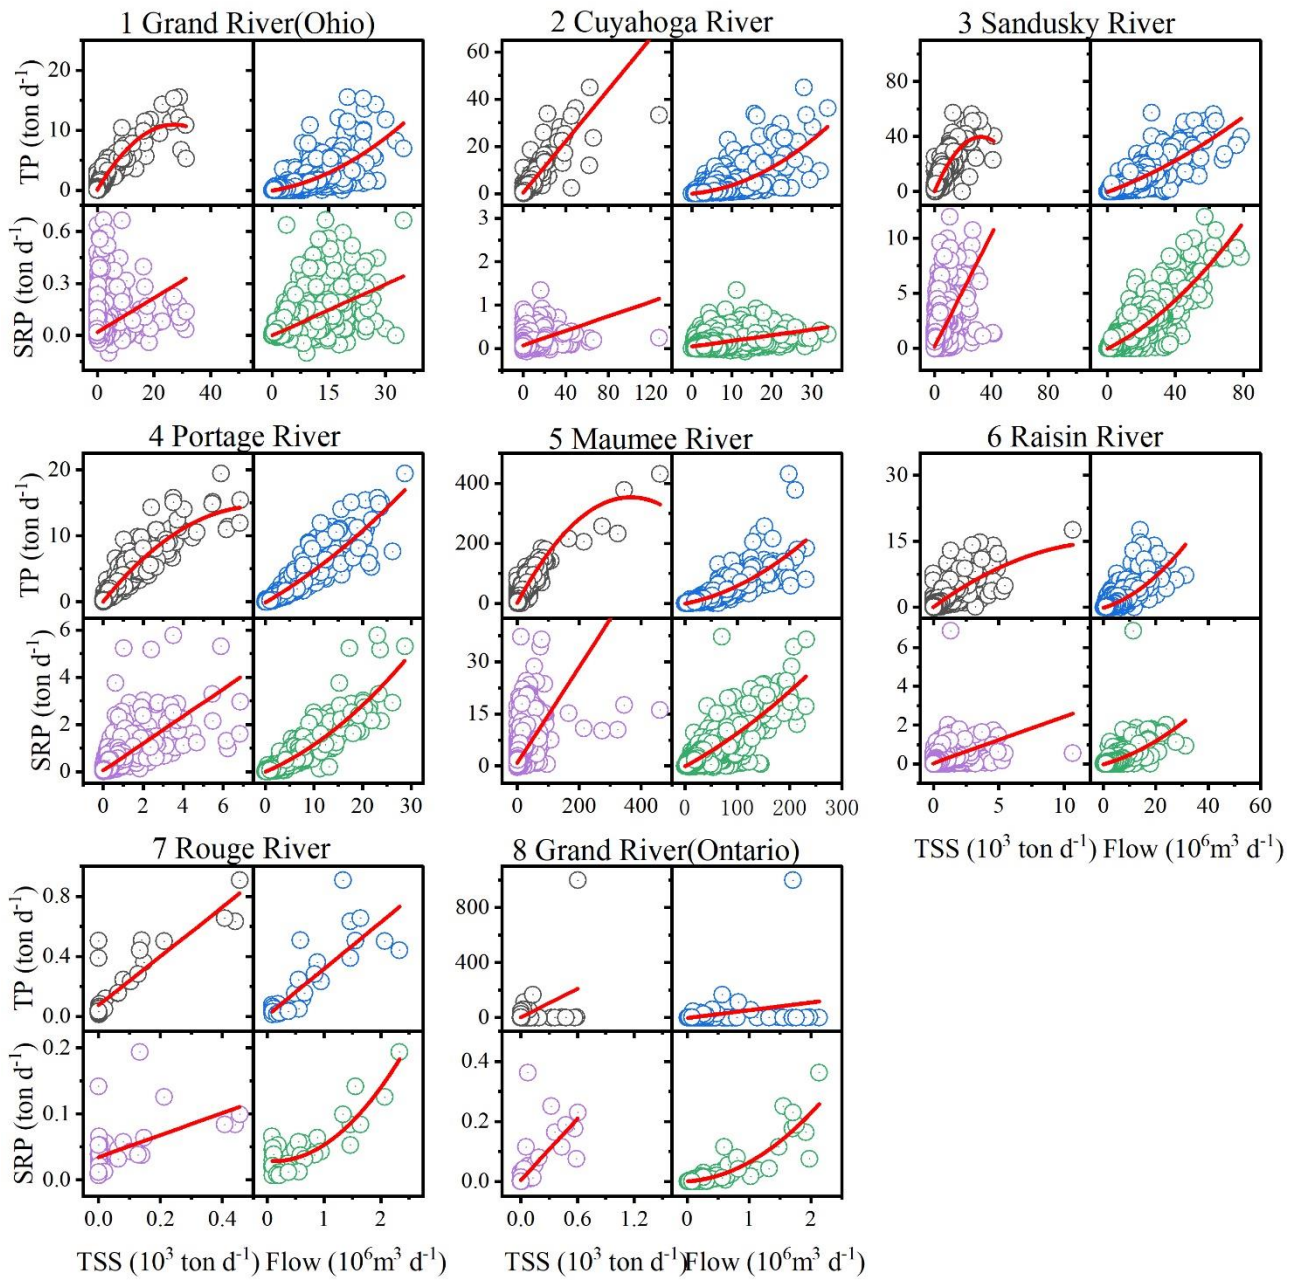

**Figure S5.** Relationship between daily flow, sediment, and daily P loads in eight Lake Eire tributaries from 1990 to 2021.

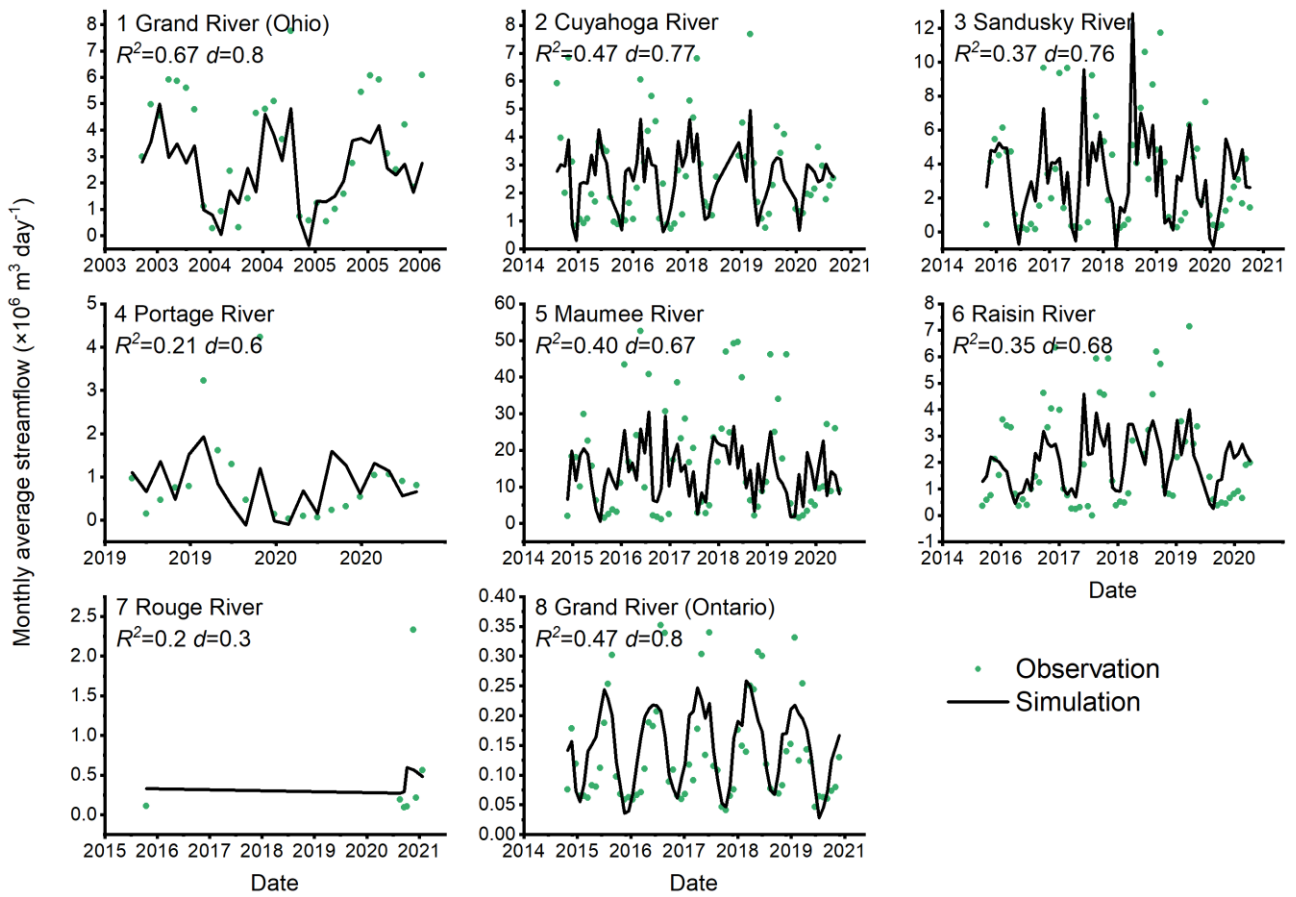

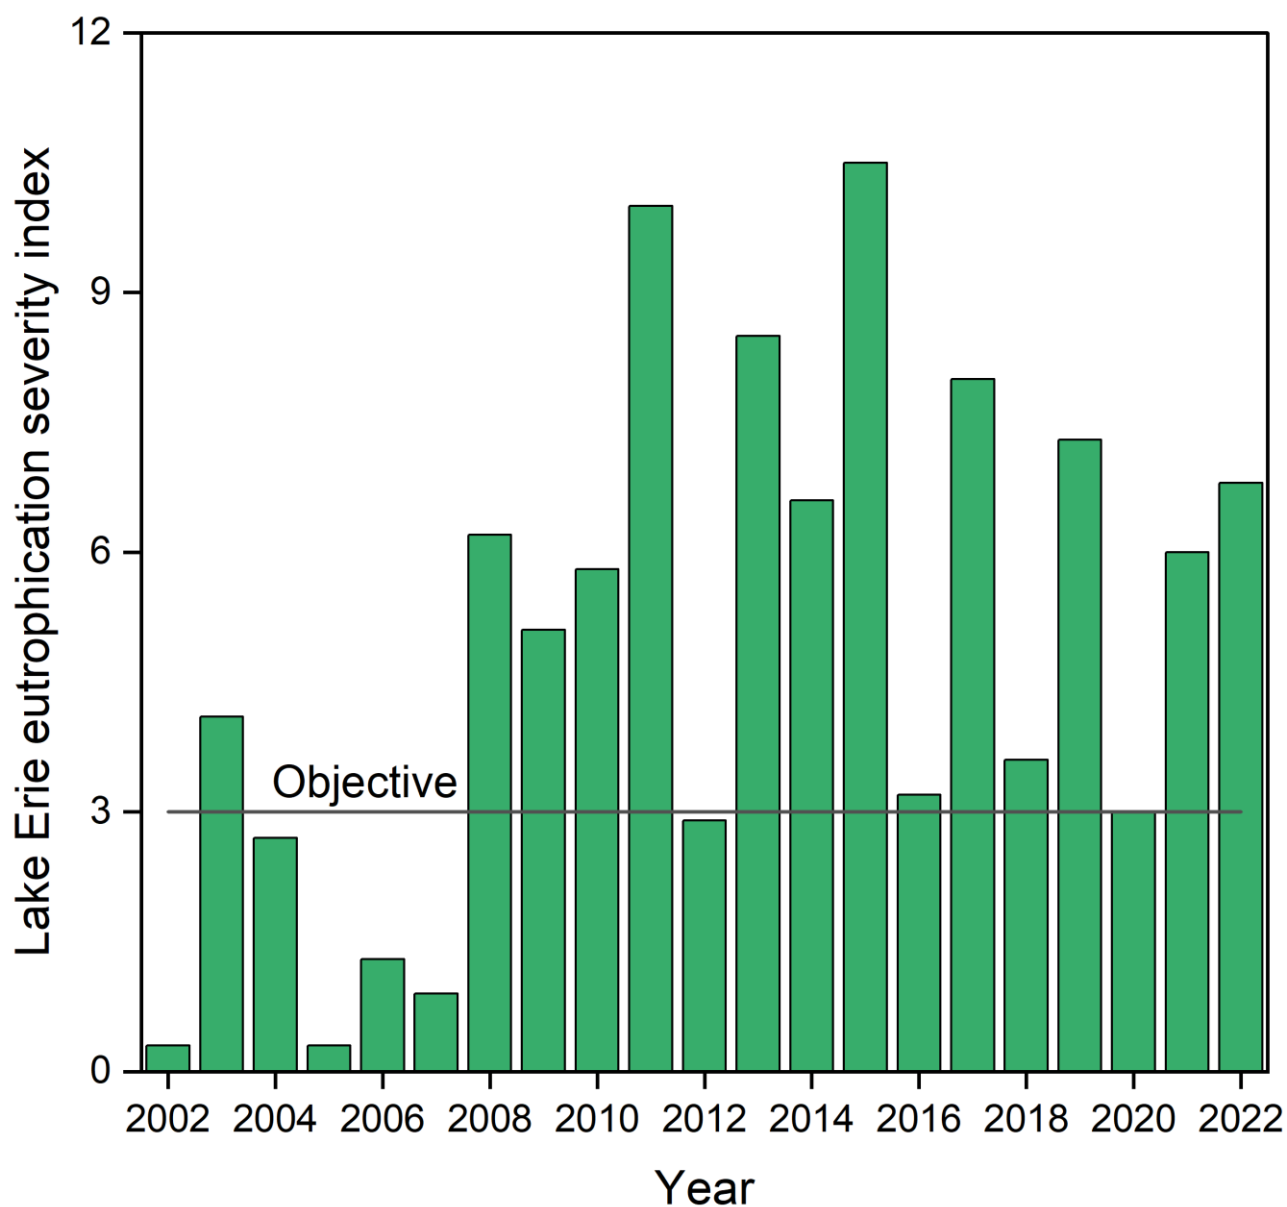

**Figure S7.** Temporal changes of Lake Erie eutrophication severity index. This information was collected from NOAA National Ocean Service (<https://coastalscience.noaa.gov/news/2022-lake-erie-algal-bloom-more-severe-than-predicted-by-seasonal-forecast/>)



59 **Table S1.** Evaluation of MLR model performance for predicting river streamflow.

| River           | leave-one-out cross validation |                       |            |
|-----------------|--------------------------------|-----------------------|------------|
|                 | <i>RMSE</i>                    | <i>R</i> <sup>2</sup> | <i>MAE</i> |
| Grand (Ohio)    | 1.67                           | 0.45                  | 1.24       |
| Cuyahoga        | 1.19                           | 0.48                  | 0.92       |
| Sandusky        | 3.42                           | 0.34                  | 2.14       |
| Portage         | 0.98                           | 0.41                  | 0.73       |
| Maumee          | 11.58                          | 0.31                  | 8.88       |
| Raisin          | 1.58                           | 0.23                  | 1.21       |
| Rouge           | 0.59                           | 0.01                  | 0.42       |
| Grand (Ontario) | 0.11                           | 0.23                  | 0.08       |

60

61
